# Supplementary material
Source: PubMed Central journal article supplement (PMC3955297)
Supplement: NIHMS562678-supplement-01.pdf [file NIHMS562678-supplement-01.pdf]

Supplemental Table 1

Case identification numbers (RID) for Alzheimer's Disease Neuroimaging Initiative subjects used for this analysis

| RID  | RID  | RID  | RID  | RID  |
|-----|-----|-----|-----|-----|-----|------|------|------|------|------|
| 3   | 149 | 300 | 438 | 611 | 747 | 874  | 1004 | 1117 | 1254 | 1366 |
| 4   | 150 | 307 | 442 | 613 | 748 | 878  | 1007 | 1118 | 1255 | 1368 |
| 6   | 155 | 310 | 443 | 619 | 750 | 887  | 1010 | 1119 | 1257 | 1371 |
| 7   | 158 | 314 | 448 | 621 | 752 | 889  | 1015 | 1120 | 1262 | 1373 |
| 10  | 160 | 316 | 449 | 625 | 753 | 890  | 1018 | 1121 | 1263 | 1378 |
| 29  | 161 | 321 | 450 | 626 | 754 | 891  | 1024 | 1122 | 1265 | 1379 |
| 30  | 162 | 324 | 457 | 627 | 759 | 892  | 1027 | 1126 | 1268 | 1382 |
| 33  | 167 | 325 | 458 | 631 | 760 | 904  | 1028 | 1130 | 1269 | 1384 |
| 38  | 169 | 326 | 461 | 633 | 769 | 906  | 1031 | 1135 | 1271 | 1385 |
| 41  | 176 | 328 | 470 | 638 | 770 | 908  | 1032 | 1137 | 1275 | 1387 |
| 42  | 178 | 331 | 474 | 641 | 777 | 909  | 1033 | 1138 | 1277 | 1389 |
| 44  | 179 | 332 | 476 | 642 | 782 | 912  | 1034 | 1140 | 1279 | 1391 |
| 45  | 182 | 335 | 478 | 644 | 783 | 913  | 1037 | 1144 | 1281 | 1393 |
| 50  | 183 | 339 | 481 | 649 | 784 | 914  | 1038 | 1148 | 1282 | 1394 |
| 51  | 187 | 341 | 485 | 653 | 786 | 915  | 1041 | 1152 | 1283 | 1397 |
| 53  | 188 | 343 | 487 | 656 | 790 | 916  | 1043 | 1154 | 1285 | 1398 |
| 54  | 190 | 344 | 492 | 658 | 792 | 917  | 1044 | 1155 | 1289 | 1400 |
| 57  | 194 | 351 | 497 | 667 | 793 | 919  | 1045 | 1157 | 1290 | 1402 |
| 60  | 195 | 354 | 501 | 668 | 796 | 921  | 1046 | 1161 | 1292 | 1406 |
| 76  | 200 | 356 | 505 | 669 | 800 | 922  | 1051 | 1164 | 1293 | 1407 |
| 77  | 204 | 361 | 507 | 671 | 802 | 924  | 1054 | 1168 | 1294 | 1408 |
| 78  | 205 | 362 | 511 | 675 | 803 | 925  | 1055 | 1170 | 1295 | 1409 |
| 80  | 214 | 366 | 513 | 679 | 812 | 929  | 1056 | 1175 | 1296 | 1411 |
| 83  | 216 | 370 | 514 | 682 | 814 | 930  | 1057 | 1183 | 1299 | 1412 |
| 84  | 217 | 372 | 517 | 689 | 816 | 932  | 1062 | 1184 | 1300 | 1414 |
| 87  | 219 | 374 | 518 | 690 | 821 | 938  | 1066 | 1185 | 1304 | 1417 |
| 88  | 221 | 376 | 528 | 691 | 825 | 941  | 1070 | 1188 | 1307 | 1418 |
| 91  | 222 | 377 | 531 | 695 | 828 | 945  | 1073 | 1192 | 1308 | 1419 |
| 93  | 227 | 378 | 535 | 696 | 829 | 947  | 1075 | 1199 | 1309 | 1420 |
| 94  | 240 | 388 | 539 | 697 | 830 | 950  | 1077 | 1201 | 1311 | 1421 |
| 98  | 243 | 389 | 543 | 699 | 832 | 952  | 1078 | 1204 | 1314 | 1423 |
| 101 | 249 | 390 | 544 | 702 | 834 | 954  | 1079 | 1205 | 1315 | 1425 |
| 102 | 256 | 392 | 546 | 708 | 835 | 955  | 1080 | 1209 | 1318 | 1426 |
| 103 | 258 | 393 | 547 | 709 | 836 | 956  | 1081 | 1210 | 1321 | 1427 |
| 107 | 266 | 394 | 549 | 712 | 839 | 958  | 1082 | 1213 | 1326 | 1430 |
| 108 | 269 | 400 | 552 | 715 | 841 | 961  | 1083 | 1215 | 1330 |      |
| 109 | 273 | 401 | 554 | 718 | 844 | 973  | 1088 | 1217 | 1331 |      |
| 110 | 282 | 404 | 557 | 720 | 850 | 976  | 1090 | 1221 | 1334 |      |
| 111 | 284 | 406 | 565 | 721 | 851 | 978  | 1092 | 1224 | 1337 |      |
| 112 | 285 | 407 | 566 | 722 | 852 | 979  | 1095 | 1225 | 1339 |      |
| 116 | 286 | 408 | 567 | 723 | 853 | 982  | 1097 | 1226 | 1340 |      |
| 126 | 288 | 409 | 568 | 724 | 855 | 987  | 1101 | 1227 | 1341 |      |
| 128 | 289 | 414 | 572 | 725 | 856 | 989  | 1102 | 1231 | 1343 |      |
| 129 | 290 | 422 | 577 | 727 | 860 | 991  | 1103 | 1240 | 1346 |      |
| 135 | 291 | 423 | 579 | 730 | 861 | 994  | 1104 | 1243 | 1350 |      |
| 138 | 292 | 424 | 588 | 733 | 865 | 995  | 1106 | 1244 | 1351 |      |
| 139 | 293 | 426 | 592 | 739 | 867 | 996  | 1109 | 1245 | 1352 |      |
| 141 | 294 | 429 | 604 | 740 | 869 | 997  | 1113 | 1246 | 1354 |      |
| 142 | 296 | 431 | 606 | 743 | 872 | 999  | 1114 | 1247 | 1357 |      |
| 147 | 299 | 434 | 608 | 746 | 873 | 1001 | 1116 | 1253 | 1363 |      |

Abbreviations: ADNI, Alzheimer's Disease Neuroimaging Initiative; RID, XXX.
